# Supplementary material for: A novel bifunctional europium complex as a potential fluorescent label for DNA detection
Source: Royal Society of Chemistry journal article supplement (doi:10.1039/c0an00072h), 2010-01-01
Supplement: c0an00072h.pdf [file c0an00072h.pdf]

## Supporting Information

### A novel bifunctional europium complex as potential fluorescent label for DNA detection

Pin-Zhu Qin, Cheng-Gang Niu\*, Min Ruan, Guang-Ming Zeng, Xiao-Yu Wang

College of Environmental Science and Engineering, Key Laboratory of Environmental Biology  
and Pollution Control (Hunan University), Ministry of Education, Hunan University, Changsha  
410082, China

State Key Laboratory for Chemo/Biosensing and Chemometrics, Hunan University,  
Changsha 410082, China

\*Corresponding author. Tel.: + 86 731 8882 3820; Fax: +86 731 8882 2829

*E-mail address:* cgniu@hnu.cn, cgniu@hotmail.com

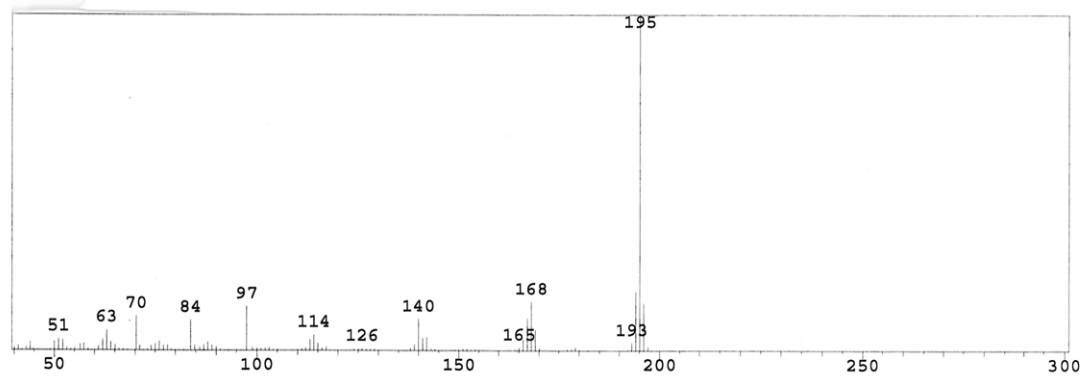

**Fig. S1** The MS spectrum of 5-NH<sub>2</sub>-phen

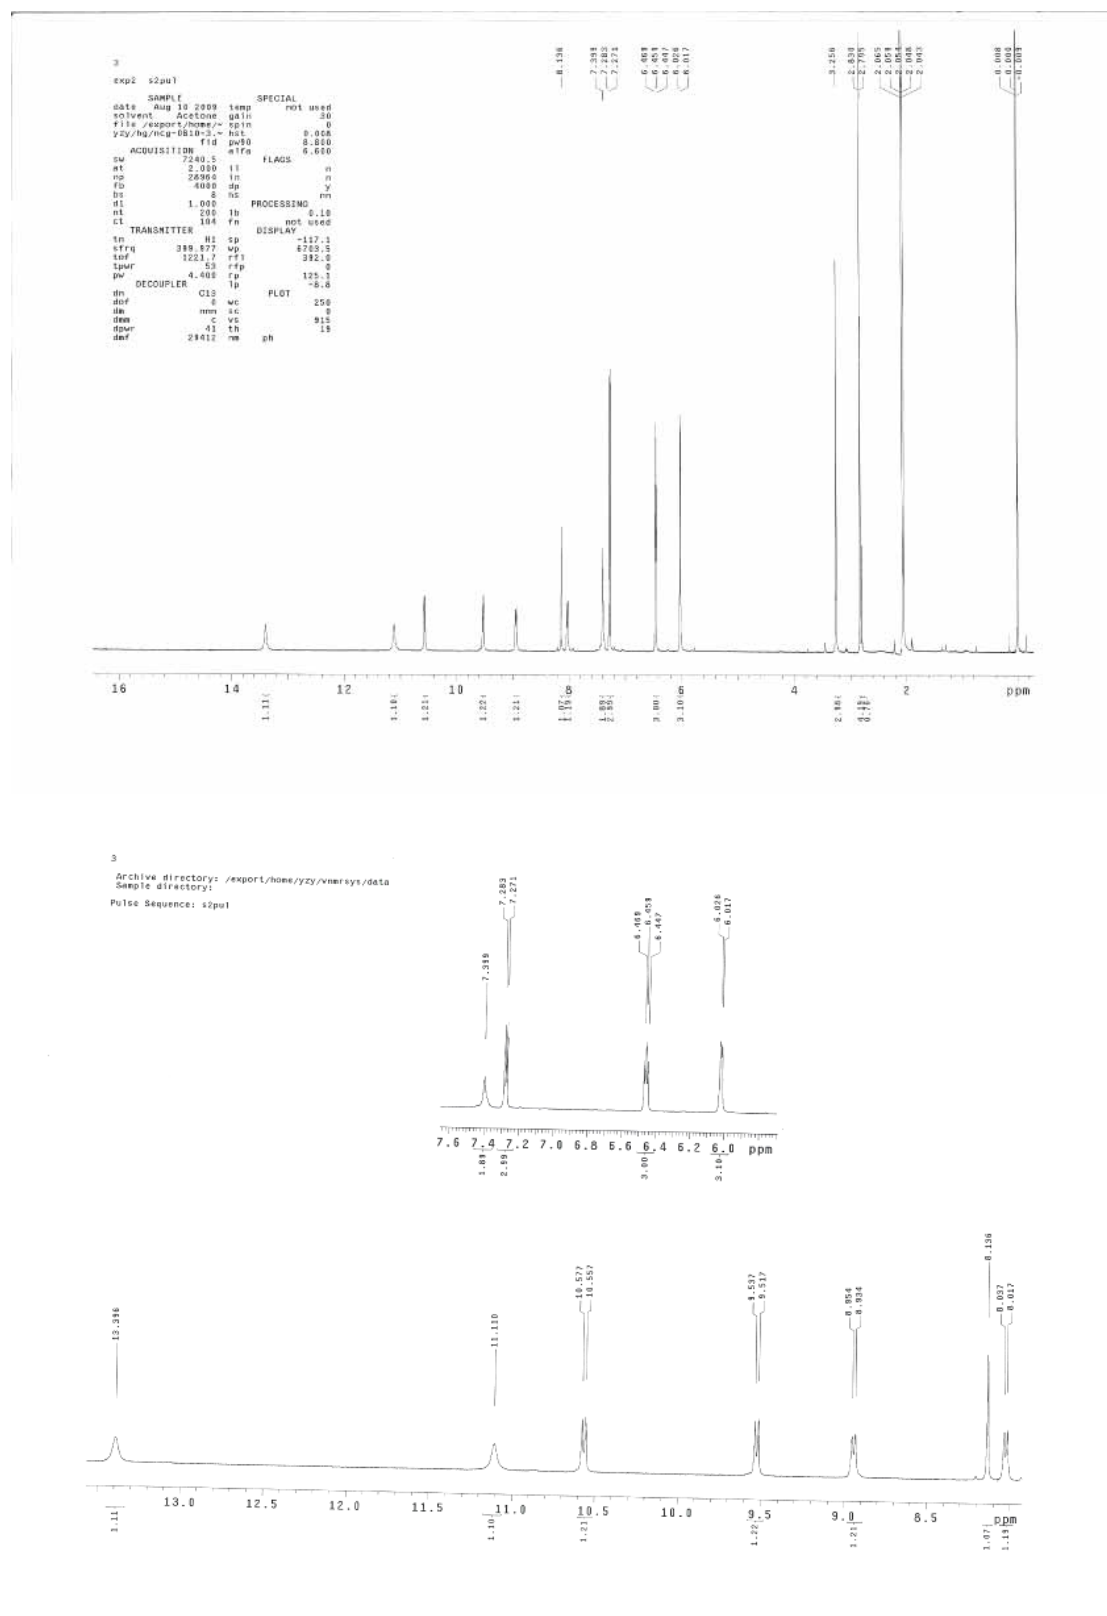

Fig. S2 The  $^1\text{H}$  NMR spectrum of the complex  $\text{Eu}(\text{TTA})_3(5\text{-NH}_2\text{-phen})$

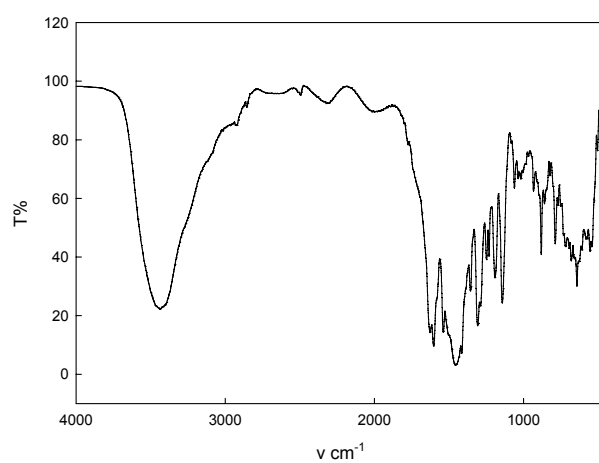

(a)

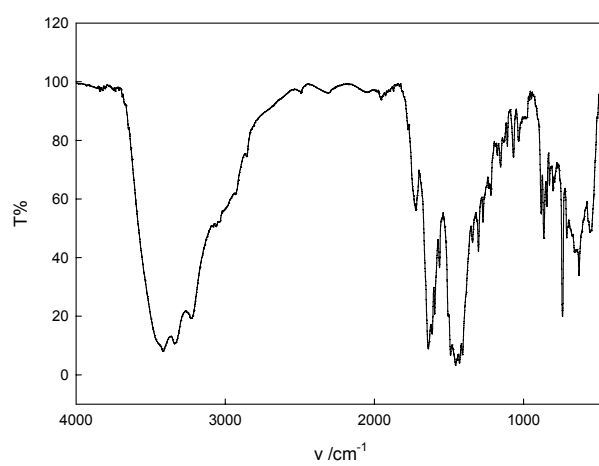

(b)

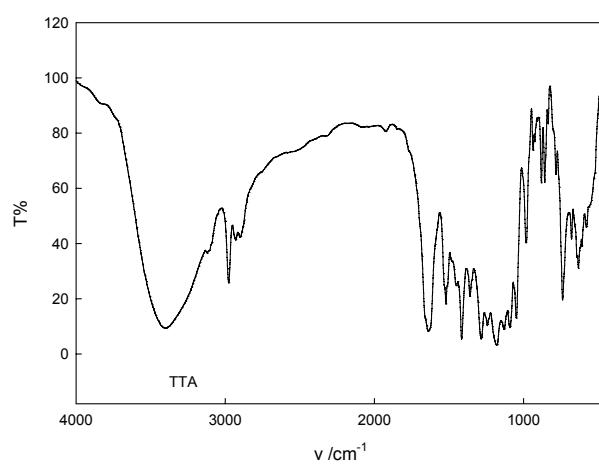

(c)

**Fig. S3** The infrared spectra of (a)  $\text{Eu}(\text{TTA})_3(5\text{-NH}_2\text{-phen})$ , (b)  $5\text{-NH}_2\text{-phen}$ , (c) TTA
